# Supplementary material
Source: PubMed Central journal article supplement (PMC7611946)
Supplement: EMS137105-supplement-Supplementary_Material.pdf [file EMS137105-supplement-Supplementary_Material.pdf]

## Supplementary materials

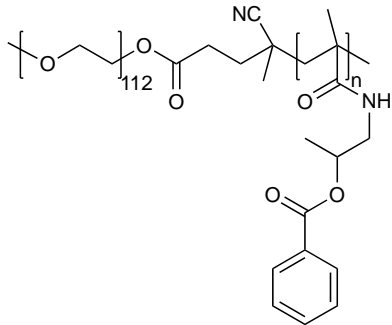

**Figure S1.** Chemical structure of polymer methoxy poly(ethylene glycol)-*b*-(N-(2-benzoyloxypropyl)methacrylamide) (mPEG-*b*-p(HPMAm-Bz)).

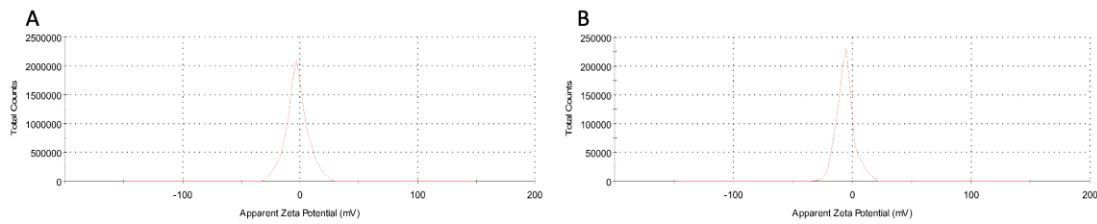

**Figure S2.** Zeta potential measurement of PM and DTX-PM loaded with 1 mg/mL DTX.

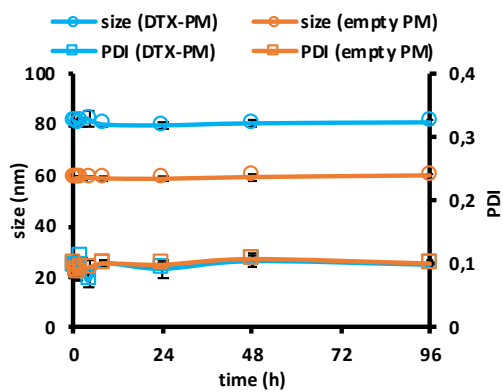

**Figure S3.** Size and polydispersity (PDI) of empty and DTX-PM in PBS 7.4 at 37 °C.

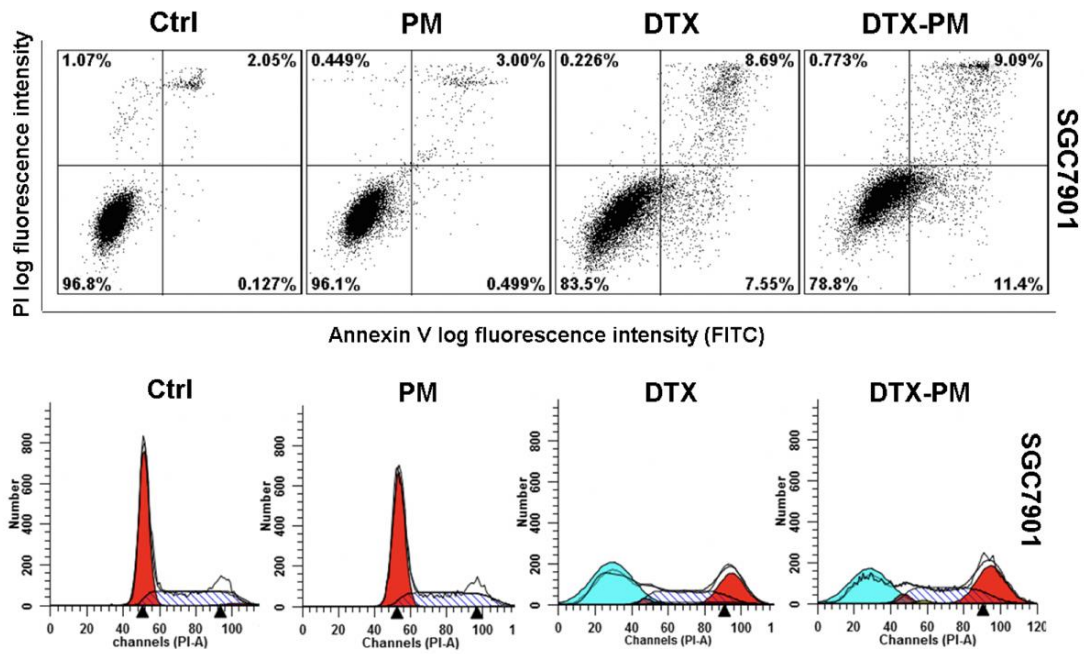

1  
2 **Figure S4.** Flow cytometry analysis of apoptosis and cell cycle arrest of SGC7901 cells  
3 induced by DTX and DTX-PM.

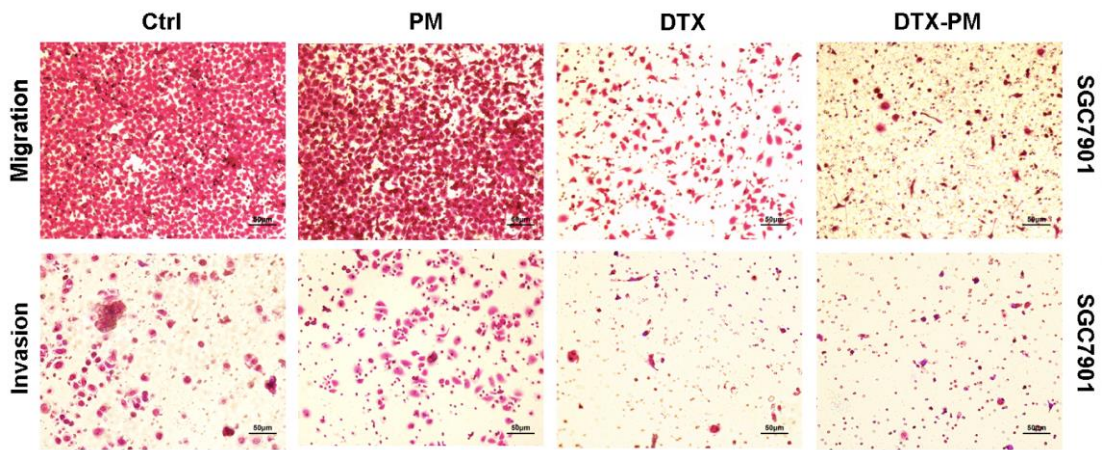

6  
7 **Figure S5.** Microscopic images of SGC7901 cell migration and invasion when treated with  
8 DTX formulations.

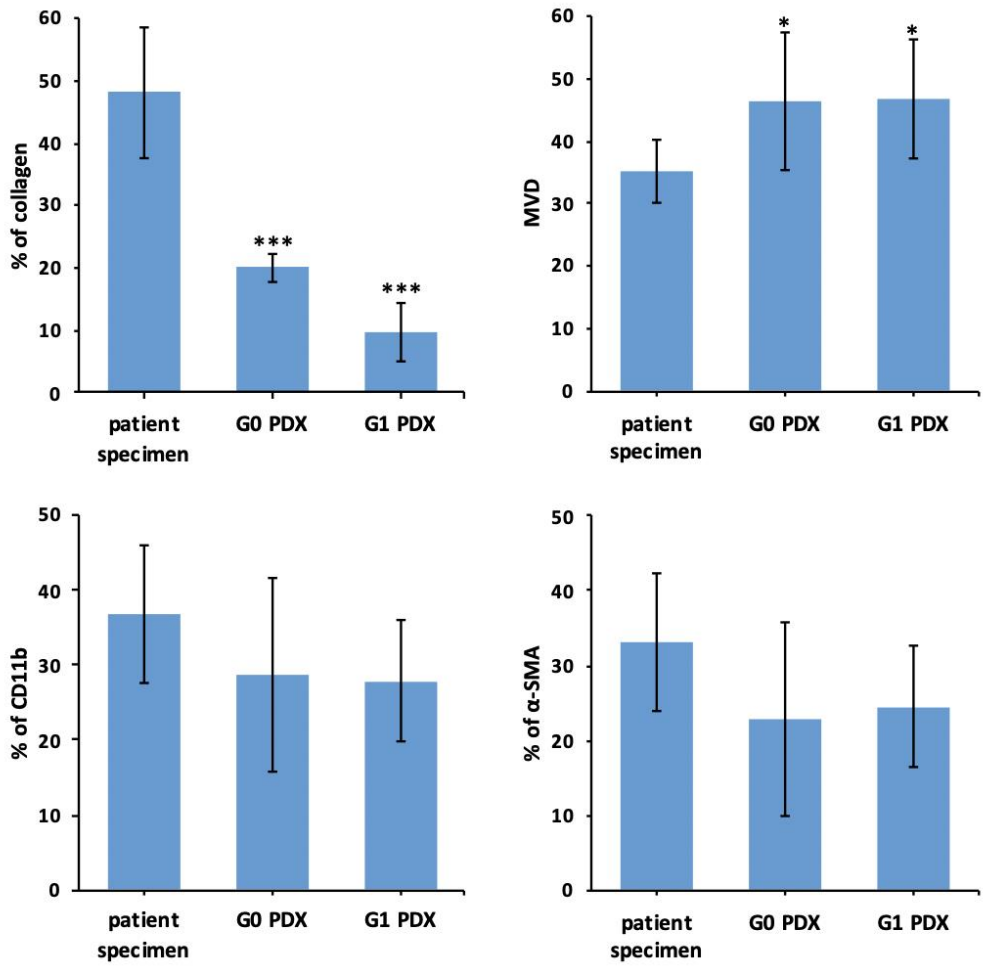

1

2 **Figure S6.** Analysis of phenotypes of patient tumor specimen and G0 and G1 PDX models.

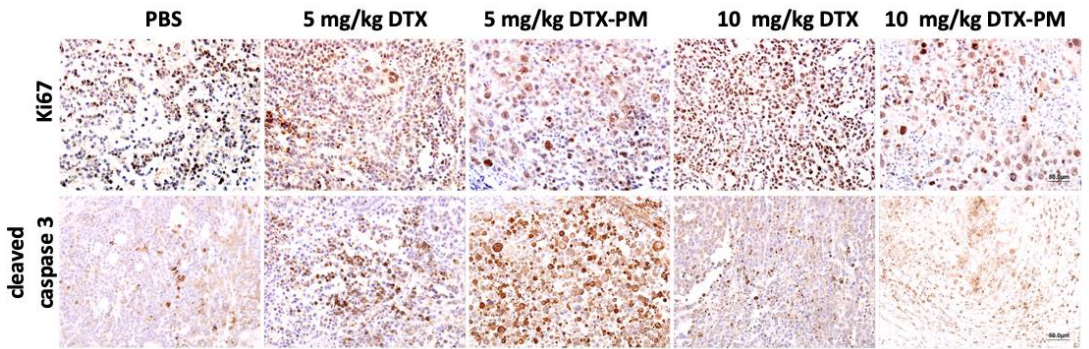

3

4 **Figure S7.** Microscope images of tumor samples for analyses of proliferation (Ki67) and  
 5 apoptosis (cleaved caspase 3) of the subcutaneous CDX model after treatment.

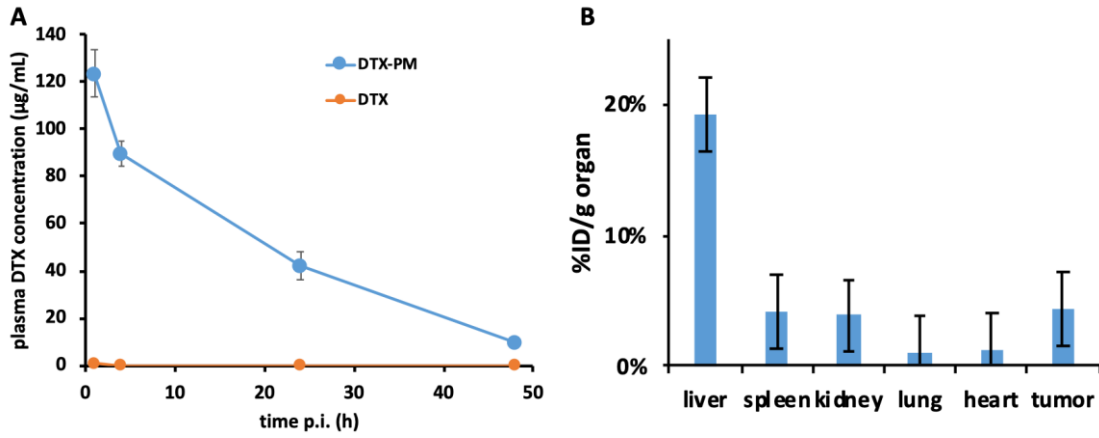

1

2 **Figure S8.** In vivo pharmacokinetics (A) of DTX-PM and DTX, as well as biodistribution (B)  
 3 of DTX-PM at 48 hours post-injection.

4

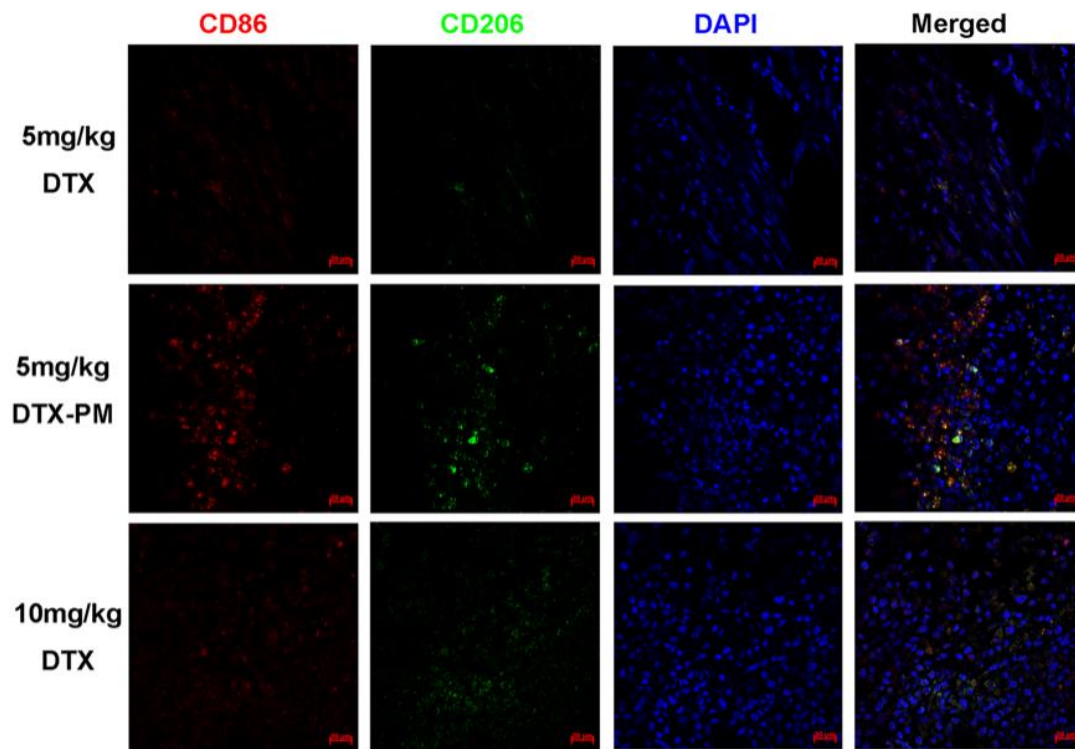

5

6 **Figure S9.** Immunofluorescence analysis of phenotypes of tumor-associated  
 7 macrophages (TAM) in the PDX model after treatment.

8

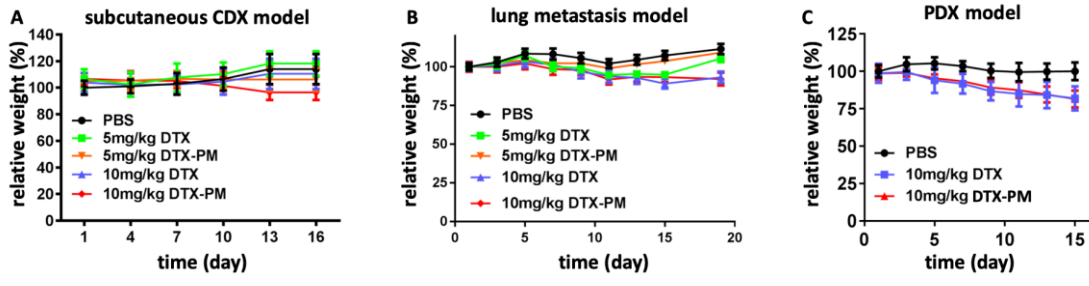

1

2 **Figure S10.** Body weight changes of mice treated with the different formulations.

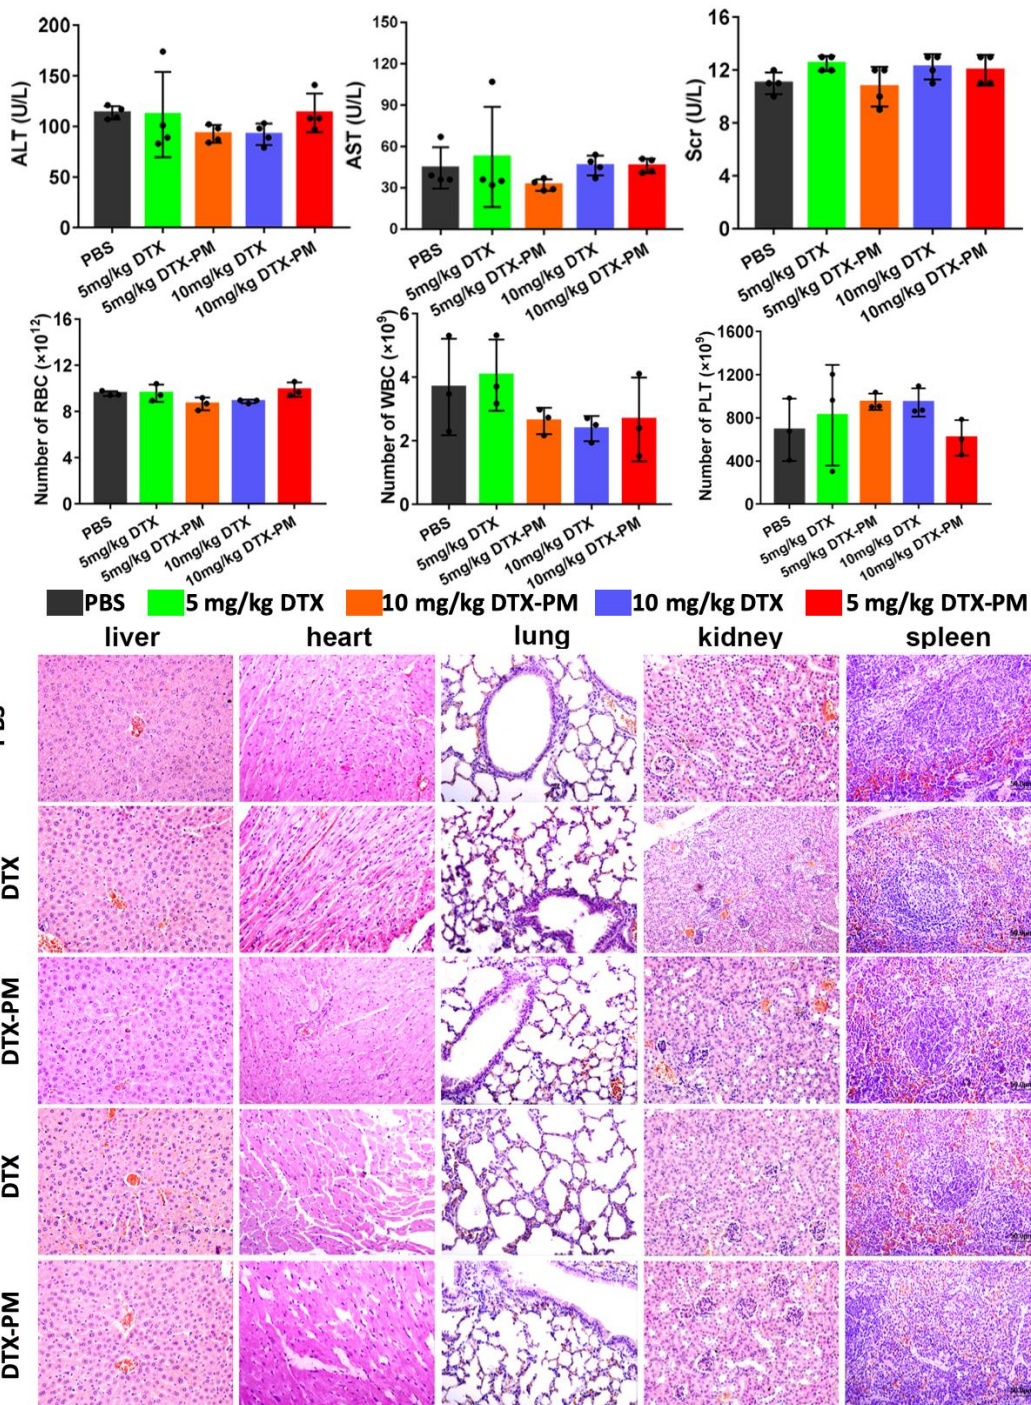

1

2 **Figure S11.** Serum concentrations of alanine aminotransferase (ALT), aspartate  
 3 aminotransferase (AST) and serum creatinine (SCr), numbers of red blood cells (RBC),  
 4 white blood cells (WBC), platelets (PLT) and H&E staining of major organs in mice from  
 5 the subcutaneous CDX model after treatment.

6

1 **Table S1.** Technical information of antibodies used in the study.

| <b>Antibody</b>                                                      | <b>Suppliers</b> | <b>Product code</b> |
|----------------------------------------------------------------------|------------------|---------------------|
| Recombinant Anti-CD86 antibody [EPR21962]                            | Abcam            | ab239075            |
| Anti-Mannose Receptor antibody (CD206)                               | Abcam            | ab8918              |
| Anti-CD11b antibody [EPR1344] (Alexa Fluor® 647)                     | Abcam            | ab204471            |
| Alpha-Smooth Muscle Actin Monoclonal Antibody (1A4), Alexa Fluor 488 | Thermo Fisher    | 53-9760-80          |
| Cleaved-Caspase 3 (Asp175), p17 Antibody                             | Affinity         | bf0711              |
| Anti-Ki67 antibody                                                   | Abcam            | ab15580             |
| Recombinant Anti-CD31 antibody [EP3095]                              | Abcam            | ab134168            |

2

3

4
